# Supplementary material
Source: publisher site journal article supplement (https://www.dovepress.com/article/455878)

Supplementary Figure 1: Comparison of RFS (A) and OS (B) between the AIT group and AT group before PSM.

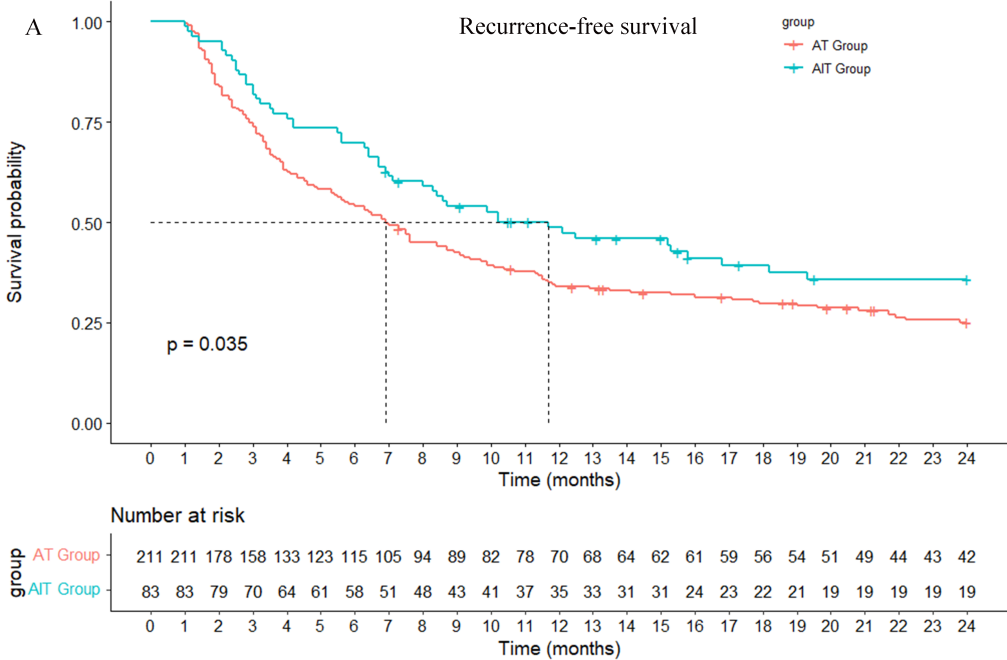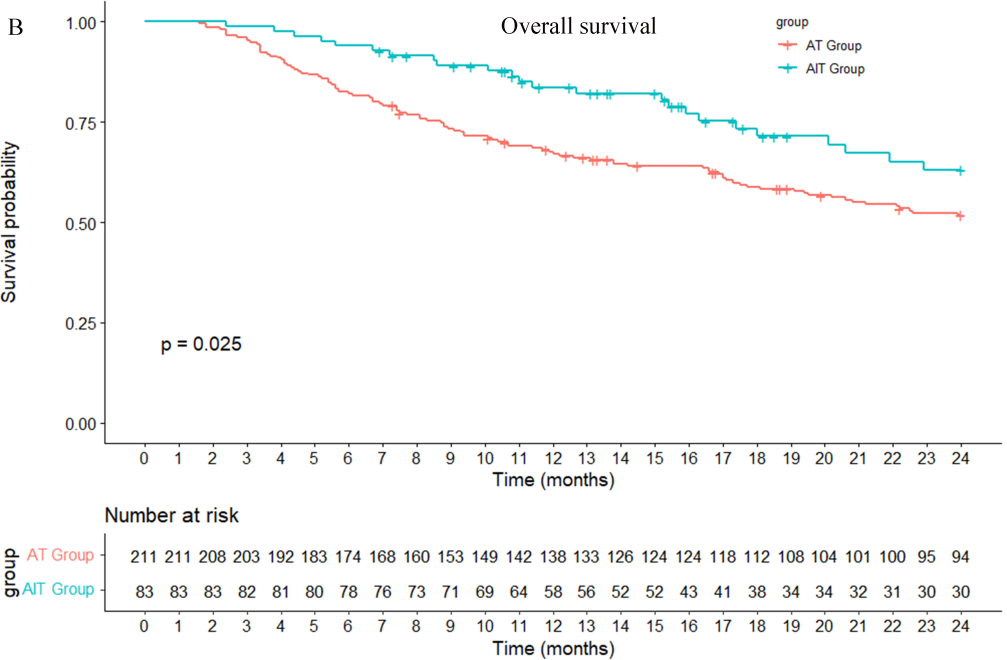

Supplementary Figure 2: Comparison of OS between different treatment modalities for recurrence after PSM.

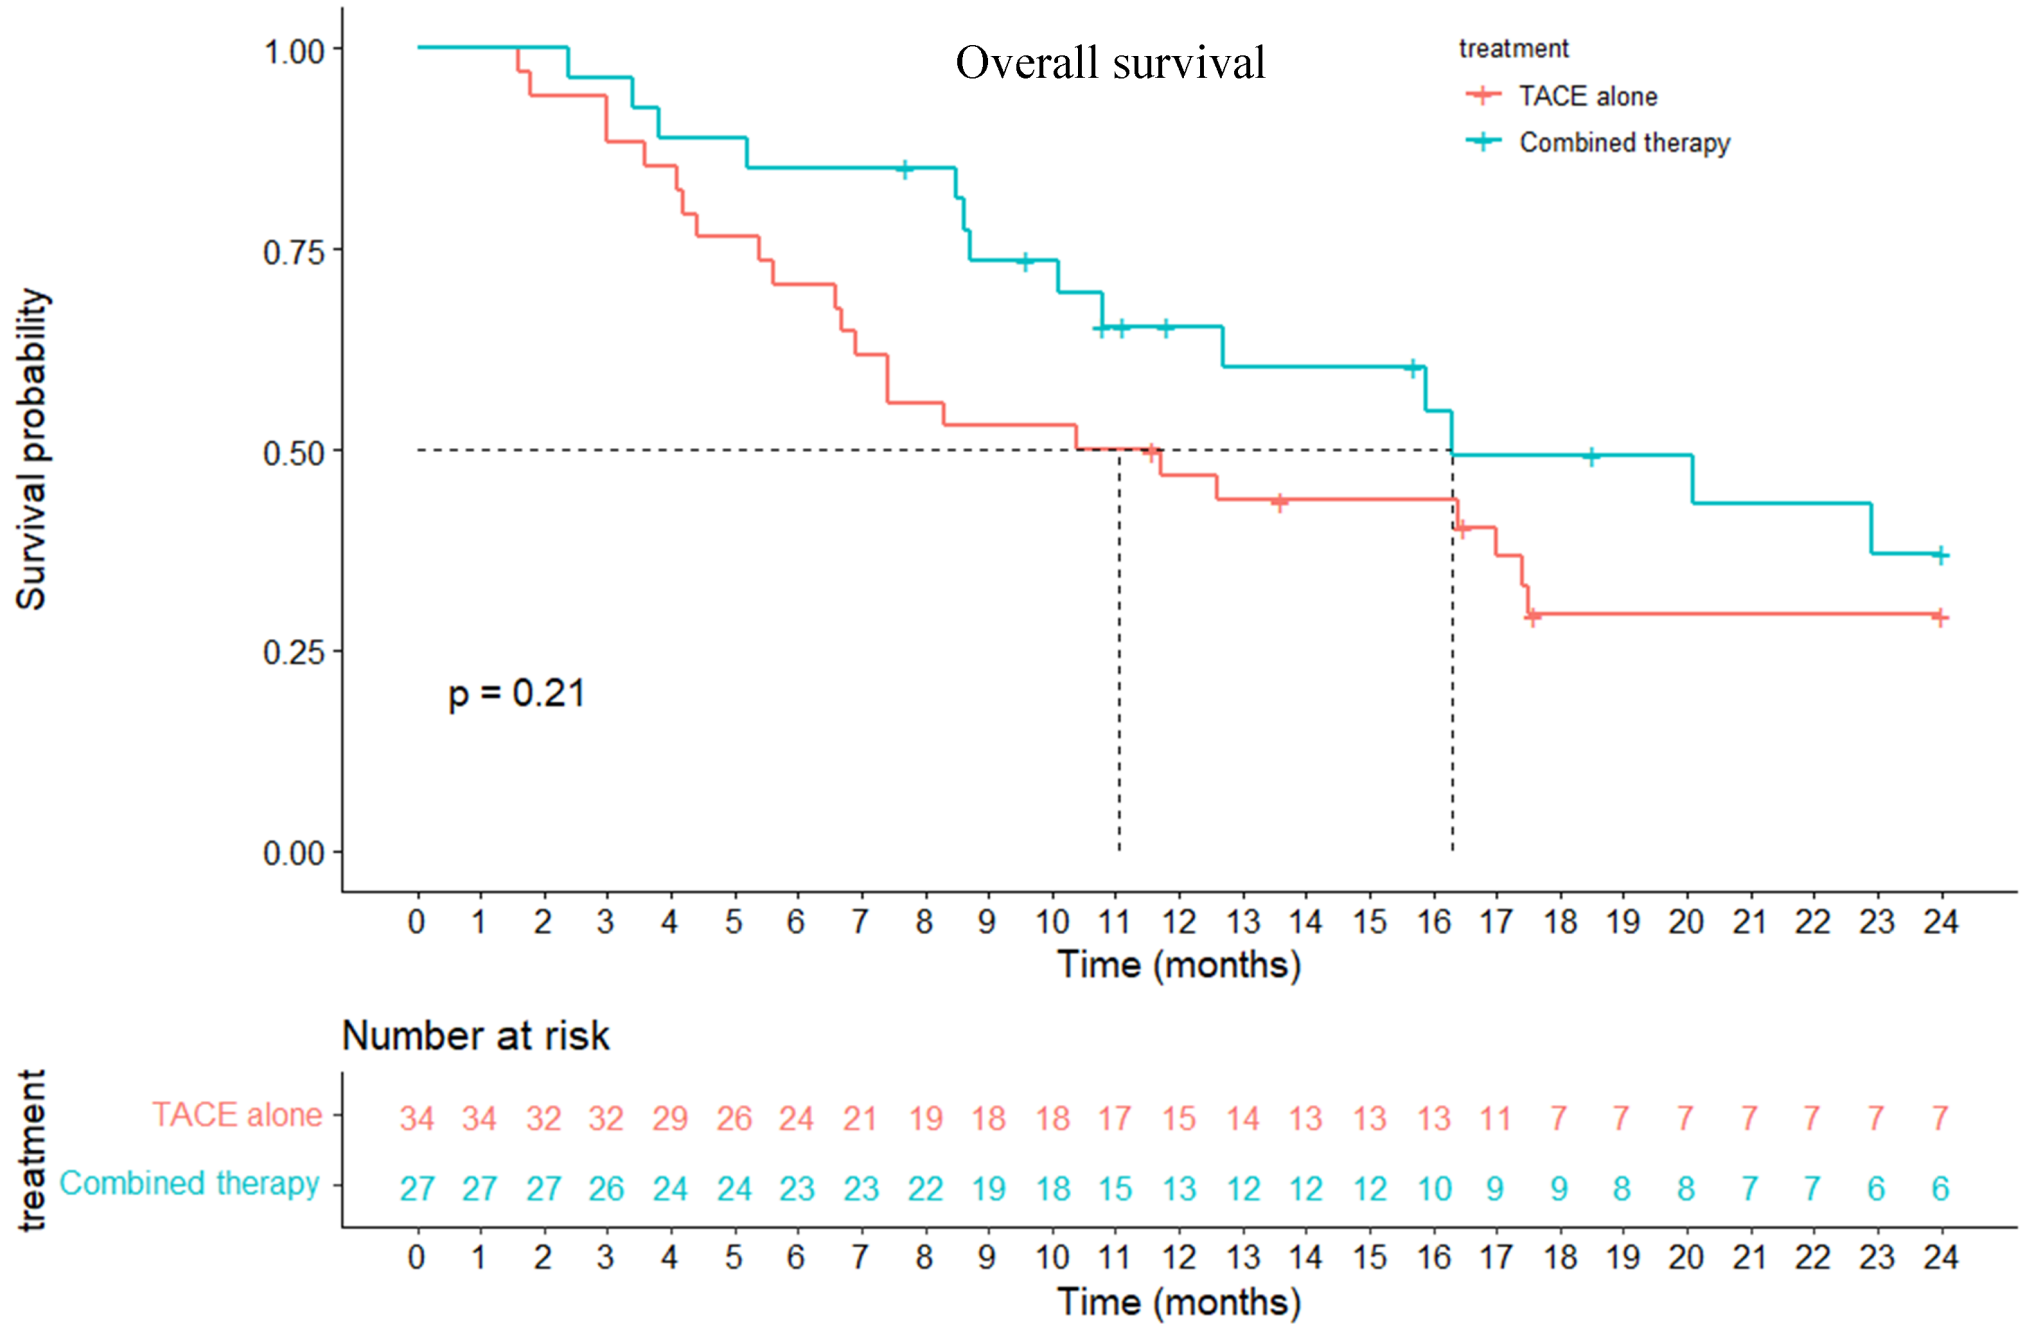

Supplementary Figure3: Comparison of RFS (A) and OS (B) among different PD-1 inhibitors

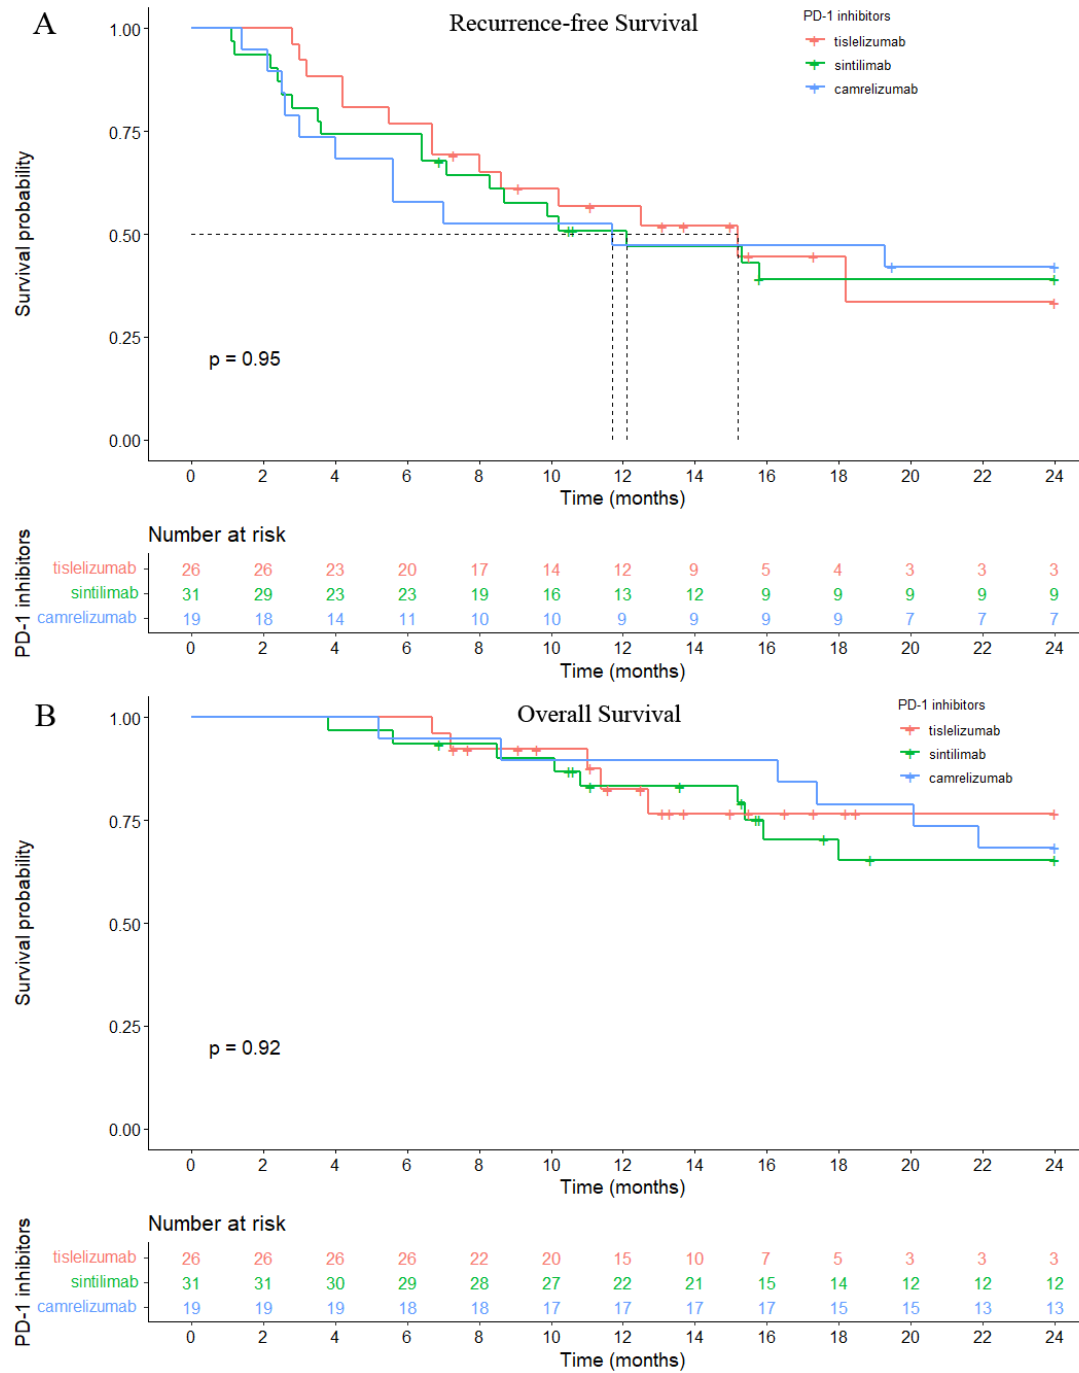

Supplement: Supplementary file 1 [file get_supplementary_file.php]
